# Supplementary material
Source: PubMed Central journal article supplement (PMC9888209)

# 1 **Supplementary Materials**

## 2 **Materials and Methods**

### 3 *1. Biological characterization*

#### 4 *1.1 Virus titration*

5 Virus titers of the two strains were measured, expressed as a half tissue culture infection  
6 dose (TCID<sub>50</sub>). In a nutshell, a 10-fold gradient dilution of virus suspension was  
7 inoculated into Vero cells cultured in 96-well plates with a total of 11 gradients diluted,  
8 and each gradient had 8 replicates. The cytopathic effect (CPE) was observed after 72h  
9 incubation at 37°C, and TCID<sub>50</sub> was calculated using Reed-Muench method (1).

#### 11 *1.2. One-step growth curve determination*

12 The one-step growth curves of two GETV isolates were measured on Vero cells and  
13 PK15 cells, respectively. The multiplicity of infection (MOI) was calculated according  
14 to the measured TCID<sub>50</sub>. Vero cells and PK15 cells were cultured in 24-well plate and  
15 inoculated with MOI=0.001 and MOI=0.1, respectively. Cell cultures were collected at  
16 12h, 24h, 36h, 48h, 60h, and 72h post infection (hpi) and their corresponding CPE was  
17 observed, TCID<sub>50</sub> of these cultures' supernatants were measured by Reed-Muench  
18 method in turn, with three replicates for each hpi.

#### 20 *1.3. Immunofluorescence assay (IFA)*

21 IFA was performed on monolayer cultured cells in 96-well plates, and GETV isolates  
22 were inoculated on Vero cells and PK15 cells according to MOI=0.001 and MOI=0.1,  
23 respectively. After incubating for 1h at 37°C, remove the inoculum and replace with  
24 fresh DMEM containing 2% FBS to maintain the culture for 24h. The cells were then  
25 fixed with 4% paraformaldehyde, incubated at room temperature for 30 min and washed  
26 with PBS for 3 times. Next, the cells were sealed with 5% skim milk, incubated at 37°C  
27 for 1h and washed three times with PBS. The cells reacted with 1:500 diluted GETV-  
28 E2 poly-antibody (prepared in our laboratory) and were incubated at 37°C for 1h, then  
29 inoculated with FITC-conjugated secondary antibody at 37°C for 1h. Finally, add 4',6-

30 diamidino-2-phenylindole (DAPI, Solarbio, China) to stain the nucleus, the cells were  
31 incubated for 10 min at room temperature and observed under a differential  
32 fluorescence microscope (Nikon, Tokyo, Japan).

33

#### 34 *1.4. Mouse infection test of GETV*

35 In the pathogenicity experiments on mouse models of GETV-GX strain, 3-day-old ICR  
36 suckling mice were inoculated intracranially with 25  $\mu$ l of  $10^{6.5}$  TCID<sub>50</sub>/0.1 ml GETV  
37 viral solution or with DMEM. Weight and survival status were observed and recorded  
38 every 24 hours until all GETV-infected suckling mice died. Mice injected with DMEM  
39 (Mock group) were euthanized. Survival analysis was performed in GraphPad software.  
40 The significance between survival mice infected with GETV and DMEM was estimated  
41 using a log rank test; \*\*\*P < 0.001.

42

#### 43 *2. Investigating the impact of environmental factors on the dispersal location and* 44 *dispersal velocity of GETV lineages*

45 For investigating the impact of environmental factors on the dispersal location of GETV  
46 lineages, we used an analytical procedure where mean environmental values are  
47 extracted and compared at node positions in inferred ( $E_{\text{inferred}}$ ) and simulated ( $E_{\text{simulated}}$ )  
48 trees (2). Simulated trees were obtained by re-simulating a relaxed random walk  
49 diffusion process along the same trees sampled from the posterior distribution under  
50 two constraints: the location inferred for the root of the trees is unchanged, and the  
51 simulated tree node positions cannot fall in non-accessible areas (such as sea areas).  
52  $E_{\text{simulated}}$  values thus correspond to the distribution of mean environmental values  
53 explored by phylogenetic nodes under a null dispersal model, i.e. a dispersal scenario  
54 that is not impacted by underlying environmental factors. For each tested environmental  
55 factor, the  $E_{\text{inferred}}$  distribution was compared to the  $E_{\text{simulated}}$  one to assess if GETV  
56 lineages tended to preferentially circulate within or avoid specific environmental  
57 conditions, a comparison formalized by the approximation of a Bayes factor support  
58 (2).

59

60 For investigating the impact of environmental factors on the dispersal velocity of GETV  
61 lineages, we employed an analytical procedure where dispersal durations associated  
62 with phylogenetic branches are compared to environmental distances computed on each  
63 environmental grid (or “raster”). These environmental distances were computed with  
64 two path models: the least-cost path model (3) and the path model implemented in the  
65 program Circuitscape (4), the latter using circuit theory to accommodate uncertainty in  
66 the route taken. The algorithm implemented in Circuitscape treats a given  
67 environmental raster as a conductance (facilitating movement) or as a resistance  
68 (impeding movement) factor. In the context of the present study, we tested the potential  
69 impact of each environmental factor acting once as a conductance and once as a  
70 resistance factor. Moreover, for each environmental factor, we generated several  
71 distinct rasters by transforming the original raster cell values with the following formula:  
72  $v_t = 1 + k(v_o/v_{max})$ , where  $v_t$  and  $v_o$  are the transformed and original cell values, and  $v_{max}$   
73 the maximum cell value recorded in the raster. The rescaling parameter  $k$  here allows  
74 the definition and testing of different strengths of raster cell conductance or resistance,  
75 relative to the conductance/resistance of a cell with a minimum value set to “1”, which  
76 corresponds to the “null” raster (see below). For each of the three environmental factors,  
77 we tested three different values for  $k$ :  $k = 10, 100$  and  $1000$ . Correlations between  
78 phylogenetic branch durations and environmental distances are estimated through the  
79 computation of the statistic  $Q$ , which is the difference between the coefficient of  
80 determination obtained when branch durations are regressed against environmental  
81 distances computed on the environmental raster and the coefficient of determination  
82 obtained when branch durations are regressed against environmental distances  
83 computed on a “null” raster (i.e. a uniform raster with a value of “1” assigned to all  
84 cells). We estimated a  $Q$  statistic for each environmental factor (treated a conductance  
85 or a resistance factor) and each of the 1,000 trees sampled from the posterior  
86 distribution. An environmental factor was only considered as potentially explanatory if  
87 both its distribution of regression coefficients and its associated distribution of  $Q$  values

88 were positive (5), i.e. with at least 90% of positive values. In this case, the statistical  
89 support associated with the resulting  $Q$  distribution was compared with the  
90 corresponding null of distribution of  $Q$  values obtained when computing environmental  
91 distances for phylogenetic branches of trees simulated under the null dispersal model  
92 introduced above. Similar to the investigation of the procedure used to explore the  
93 impact of environmental factors on the dispersal locations of lineages, the comparisons  
94 between inferred and simulated distributions of  $Q$  values were formalized by  
95 approximating Bayes factor support (6).

96

## 97 **Result**

### 98 *Sequence similarity*

99 A total of 78 GETV positive sample were detected in 16 provinces in China, from 2017  
100 until now. Two pet canines, and one bovine were found infected GETV. There was no  
101 difference in genomic structure between the 16 new genome sequences and the known  
102 GETV virus, and the nucleotide similarity at the genome-level obtained in this study  
103 was 96.98%-99.99%, with reference sequences was 93.99%-99.99%. The similarity  
104 between E2 genes obtained in this study at the nucleotide level was 94.24%-100%, and  
105 compared with the online reference, the similarity at the nucleotide level was 92.98%-  
106 100%. The amino acid similarity was 94.24%-100% and 92.98%-100%, respectively.  
107 In addition, the similarity between bovine E2 gene and GETV of infected other species  
108 at amino acid level was 94.49%-99.75%, which was the most similar to GETV from  
109 *Culex tritaeniorhynchus* Giles. In addition, the similarity between canine E2 gene and  
110 GETV infected with other species at amino acid level was 93.48%-100%, which was  
111 the most similar to GETV from Pigs.

112

## 113 **Reference**

- 114 1. REED LJ, MUENCH H. 1938. A SIMPLE METHOD OF ESTIMATING FIFTY PER CENT  
115 ENDPOINTS<sup>12</sup>. American Journal of Epidemiology 27:493-497.
- 116 2. Dellicour S, Troupin C, Jahanbakhsh F, Salama A, Massoudi S, Moghaddam MK, Baele G,  
117 Lemey P, Gholami A, Bourhy H. 2019. Using phylogeographic approaches to analyse the  
118 dispersal history, velocity and direction of viral lineages — Application to rabies virus spread

119 in Iran. *Molecular Ecology* 28:4335-4350.

120 3. Dijkstra EW. 1959. A note on two problems in connexion with graphs. *Numerische Mathematik*  
121 1:269-271.

122 4. McRae BH. 2006. ISOLATION BY RESISTANCE. *Evolution* 60:1551-1561.

123 5. Jacquot M, Nomikou K, Palmarini M, Mertens P, Biek R. 2017. Bluetongue virus spread in  
124 Europe is a consequence of climatic, landscape and vertebrate host factors as revealed by  
125 phylogeographic inference. *Proc Biol Sci* 284.

126 6. Dellicour S, Rose R, Faria NR, Vieira LFP, Bourhy H, Gilbert M, Lemey P, Pybus OG. 2017.  
127 Using Viral Gene Sequences to Compare and Explain the Heterogeneous Spatial Dynamics of  
128 Virus Epidemics. *Molecular Biology and Evolution* 34:2563-2571.

129  
130  
131  
132  
133  
134  
135  
136  
137  
138  
139  
140  
141  
142  
143  
144  
145  
146  
147  
148  
149  
150  
151  
152  
153  
154  
155  
156  
157  
158  
159  
160  
161  
162

163 **Supplementary Figures and Tables**

164 **Figure S1.** Environmental factors tested for their impact on the dispersal of GETV  
165 lineages in China.

166

167 **Figure S2.** GETV positive cases bar plots. The bar plot under the x-axis represents the  
168 number of reported cases of GETV infected mammals in China since 2015. (A) Number  
169 of GETV cases in seven regions of China over three time periods from 2015-2017,  
170 2018-2019, and 2020-2021. (B) Number of GETV cases in each season from 2015 to  
171 2021.

172

173 **Figure S3.** Characterization of GETV in cells and suckling mice. (A) 293T or U251  
174 cells were infected with GETV. At 48 hpi, cytopathic changes were observed. (B)  
175 Immunofluorescence of GETV Capside protein monoclonal antibody (green) detected  
176 in infected 293T or U251 cells, respectively (blue corresponds to DAPI). All fluorescent  
177 images were taken at 20× magnification. (C) Weight of mice after infection with GETV.  
178 The weight of the mice is plotted against the time of infection. (D) Survival of mice  
179 after infection with GETV. No death was detected after 80h in DMEM group but all  
180 the suckling mice in the infected group died after 80h. (E) Clinic symptoms of mice  
181 after being infected by GETV.

182

183 **Figure S4.** Root-to-tip regression analysis performed with the program TempEst (here  
184 best-fitting the root by maximizing the coefficient of determination  $R^2$  of the linear  
185 regression).

186

187 **Figure S5.** Comparison of skygrid viral effective population size reconstructions with  
188 time-varying covariates. Each plot depicts the mean effective population size trajectory  
189 (dark blue), its corresponding 95% highest posterior density interval region (light blue),  
190 and a time-varying covariate (dark red). (A) The different covariates are: annual forest  
191 area, (B) annual precipitation, (C) annual pork production, and (D) annual mean

192 temperature.

193

194 **Figure S6.** Analysis of lineage dispersal events associated with the maximum clade  
195 credibility (MCC) tree obtained from the continuous phylogeographic inference.

196

197 **Table S1.** Positive selected amino acid sites of E2 gene of GETV.

| Amino acid site | FEL | SLAC | MEME | FUBAR |
|-----------------|-----|------|------|-------|
| 86              | +   | -    | +    | +     |
| 253             | -   | -    | -    | +     |
| 323             | +   | -    | +    | +     |

198

199 **Table S2.** Impact of several environmental factors on the dispersal location of GETV  
200 lineages in China. We report Bayes factor (BF) supports for the association between  
201 environmental values and tree node locations. The results are based on 100 posterior  
202 trees obtained by spatially-explicit phylogeographic inference. Following Kass &  
203 Raftery (1995), we consider a BF value >20 as strong support for a significant  
204 correlation between the environmental distances and dispersal durations (in bold).

| Environmental factor    | Tendency of viral lineages to avoid circulating within specific environmental conditions | Tendency of viral lineages to preferentially circulate within specific environmental conditions |
|-------------------------|------------------------------------------------------------------------------------------|-------------------------------------------------------------------------------------------------|
| Savannas                | 0.3                                                                                      | 3.5                                                                                             |
| Forests                 | 0.3                                                                                      | 2.9                                                                                             |
| Croplands               | 0.1                                                                                      | 17.2                                                                                            |
| Urban areas             | 0.1                                                                                      | 13.3                                                                                            |
| Elevation               | <b>49.0</b>                                                                              | 0.0                                                                                             |
| Annual mean temperature | 0.0                                                                                      | <b>&gt;99</b>                                                                                   |
| Annual precipitation    | 0.1                                                                                      | 12.3                                                                                            |
| Pig population density  | 0.0                                                                                      | <b>&gt;99</b>                                                                                   |

205

Figure S1

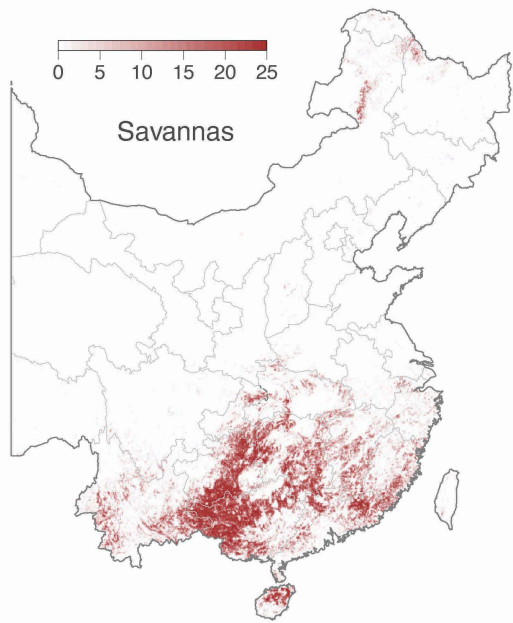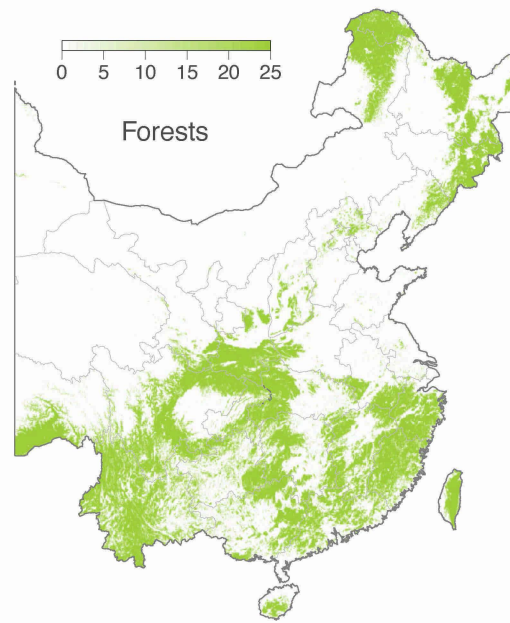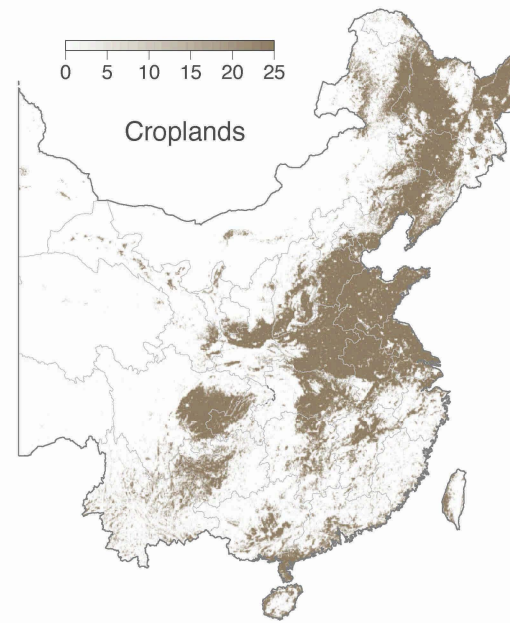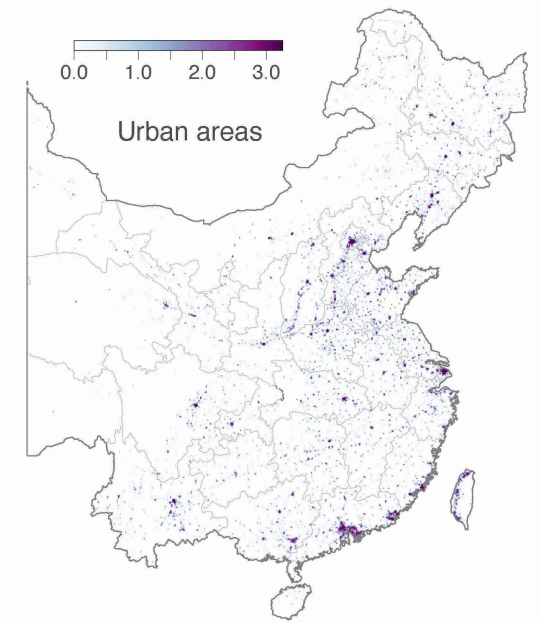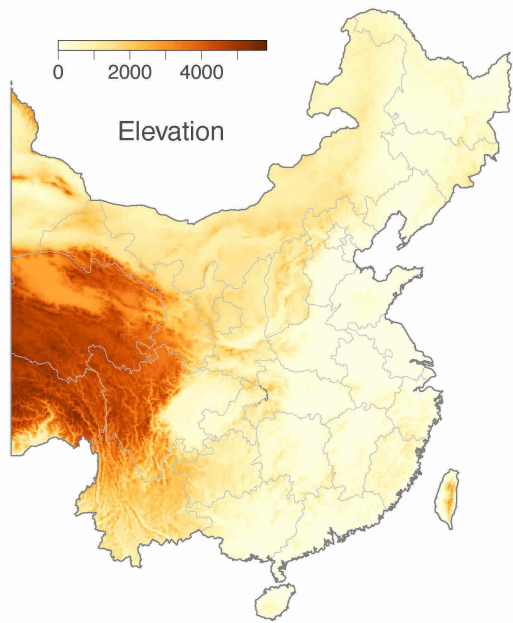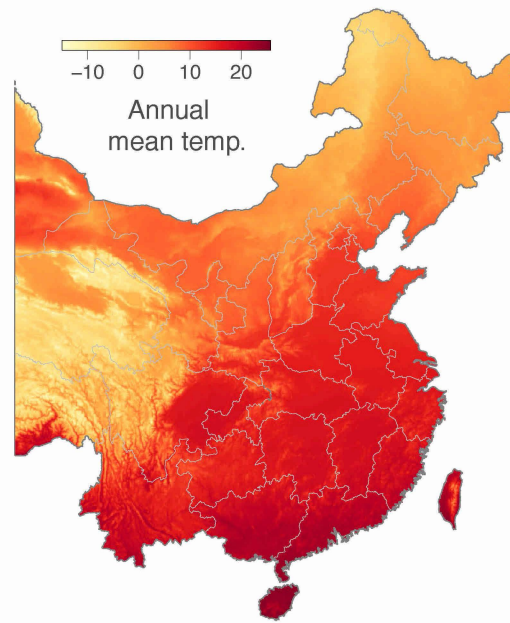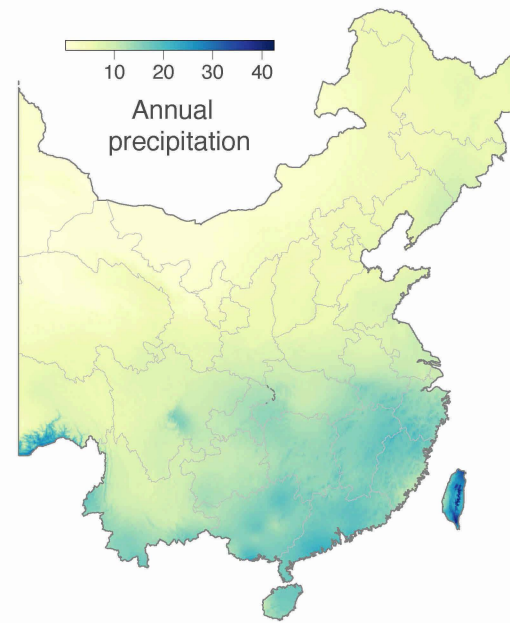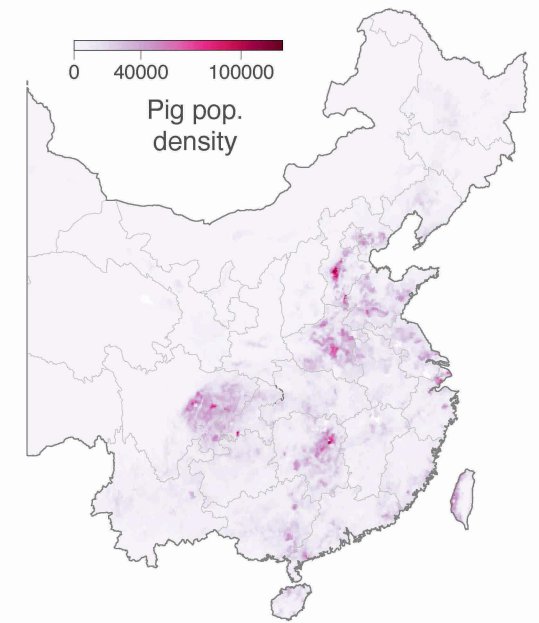



# Figure S2

## A

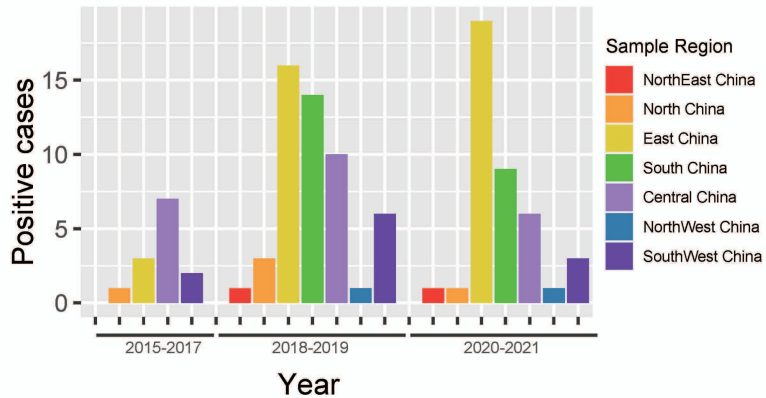

## B

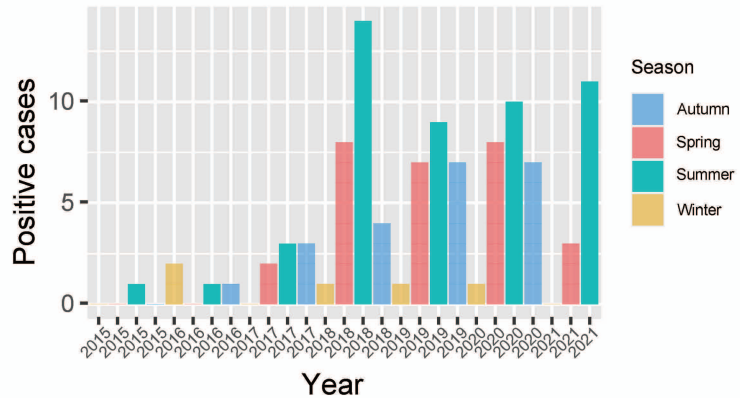

Figure S3

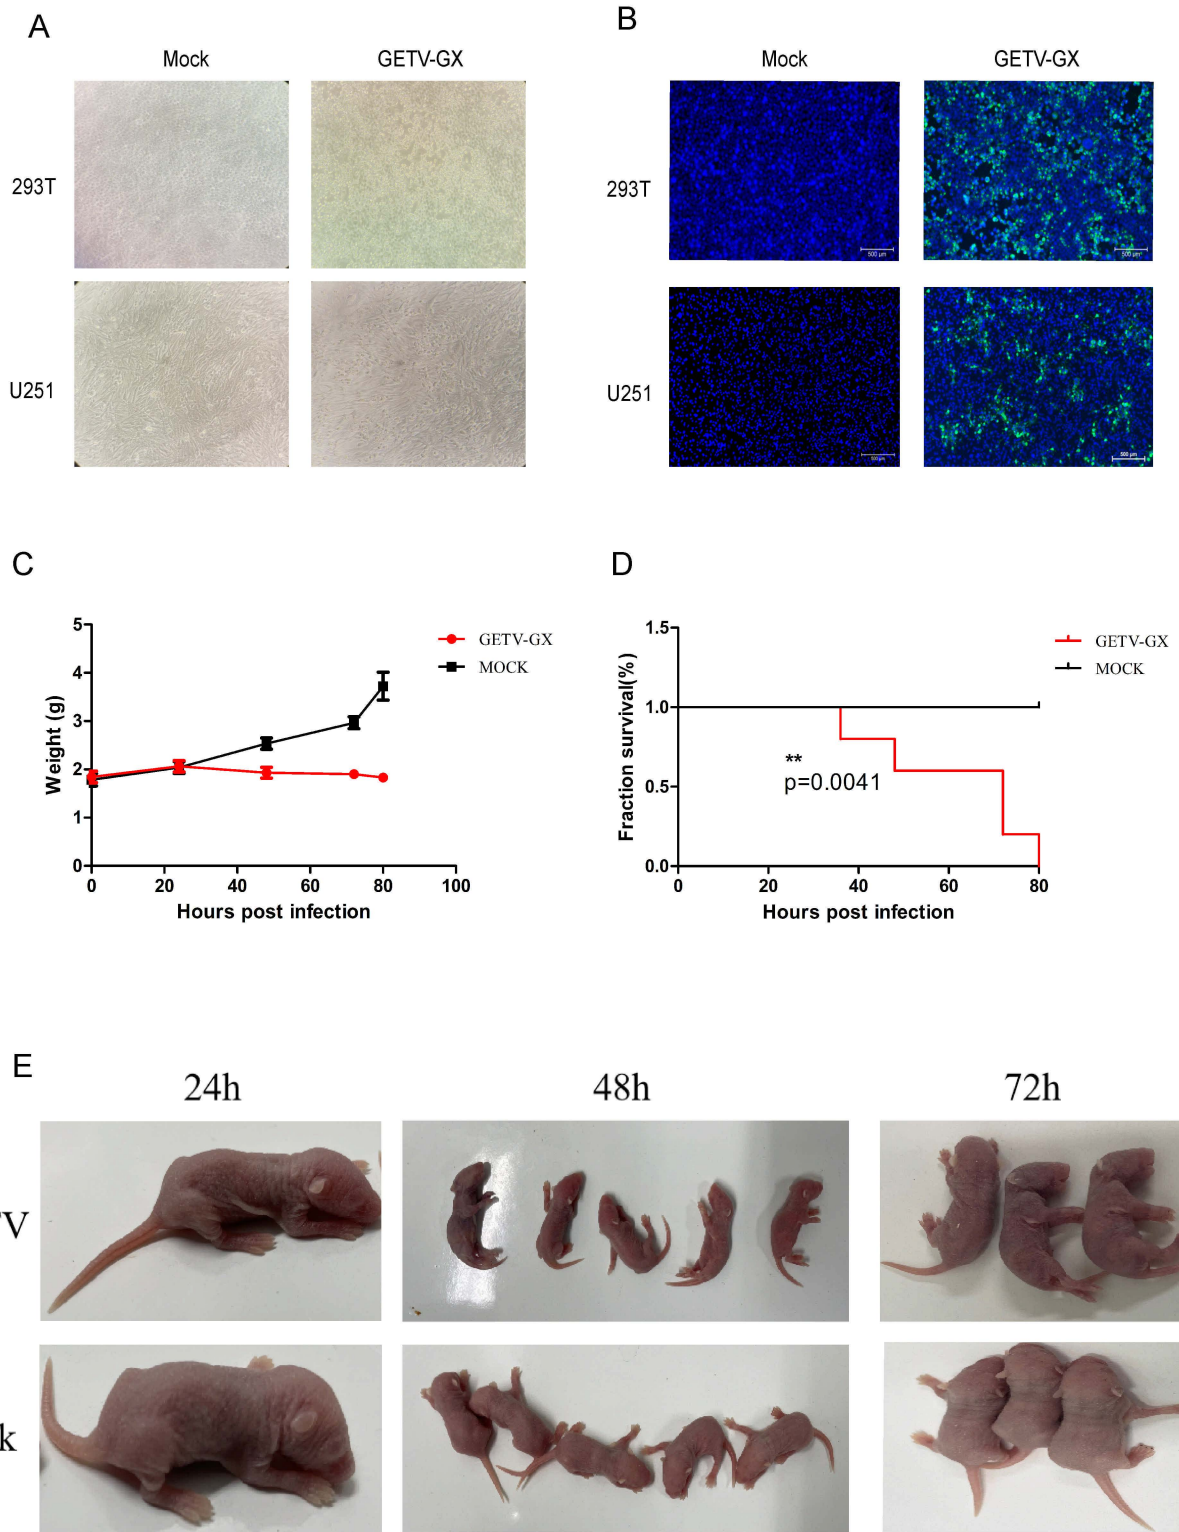

Figure S4

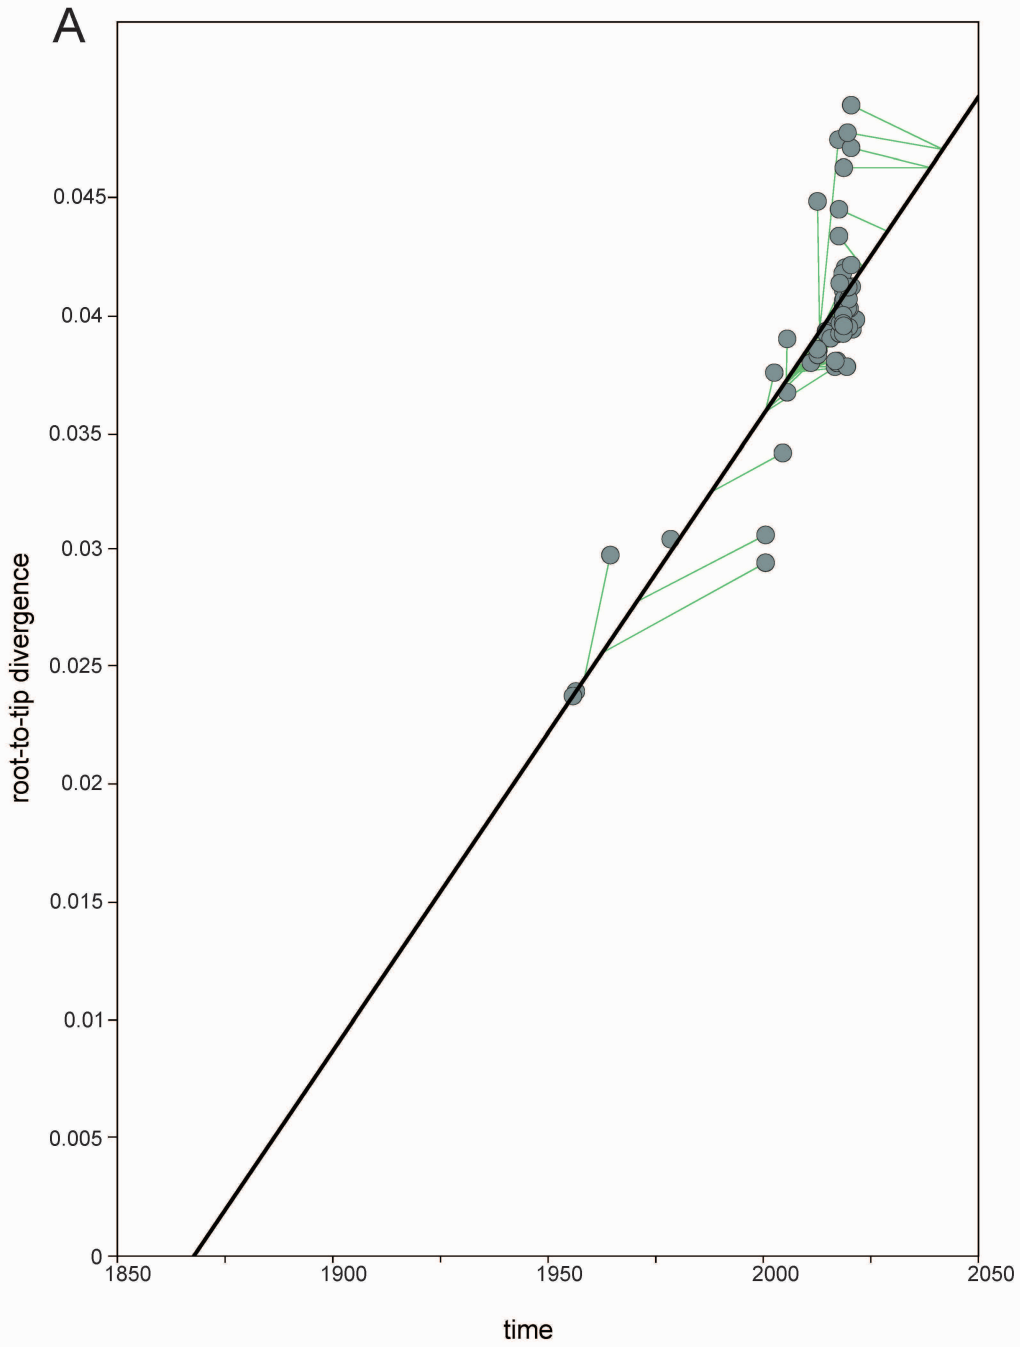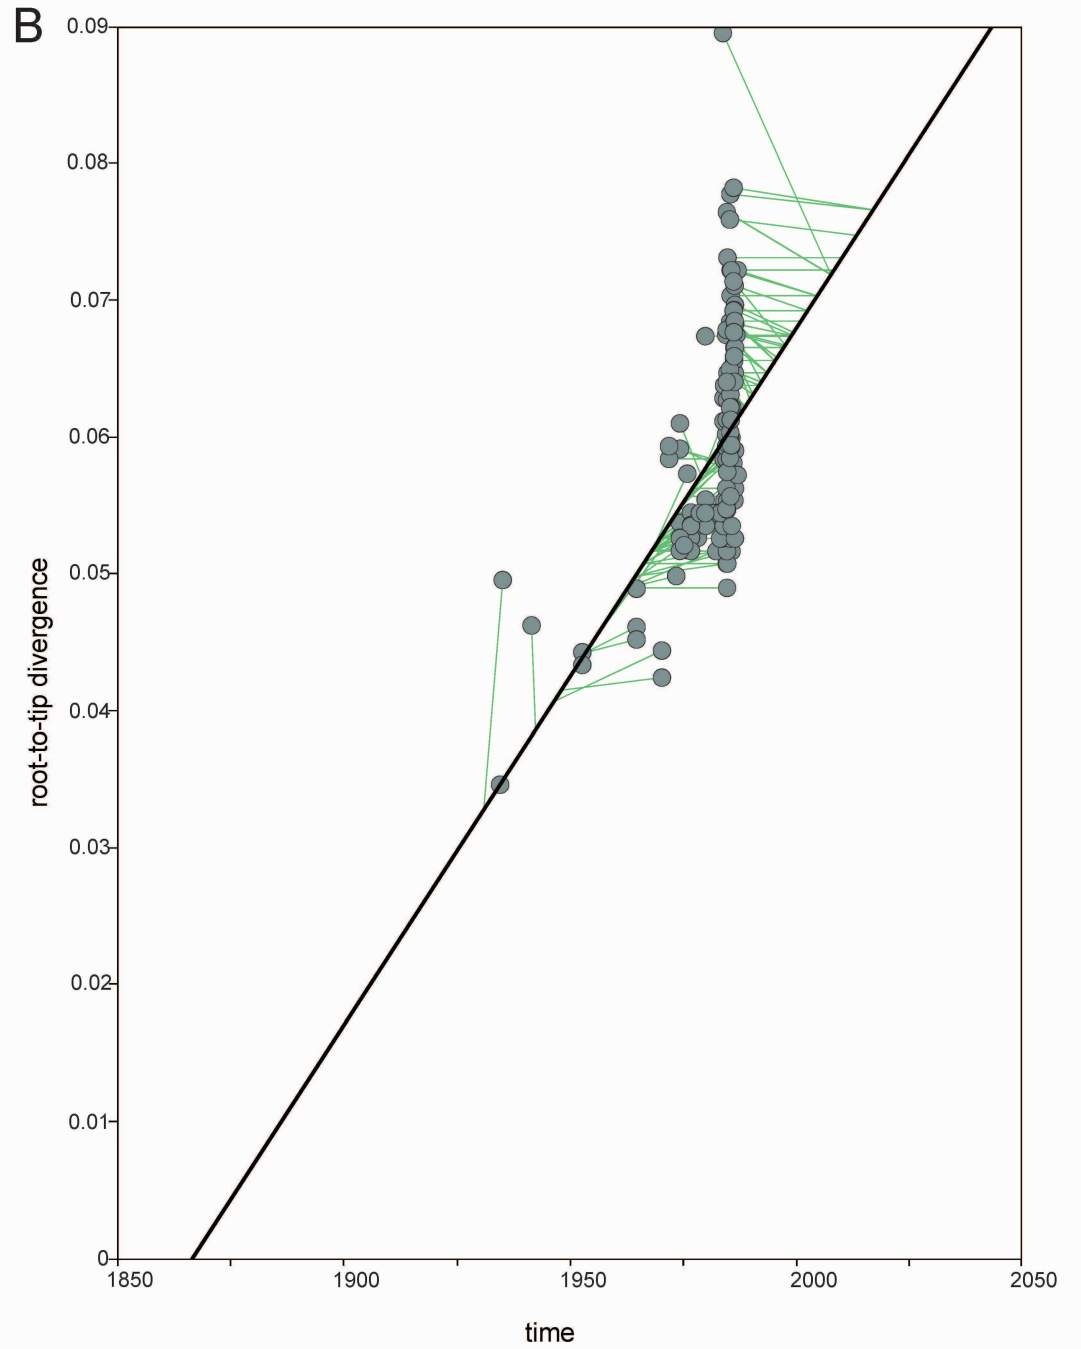

# Figure S5

### A

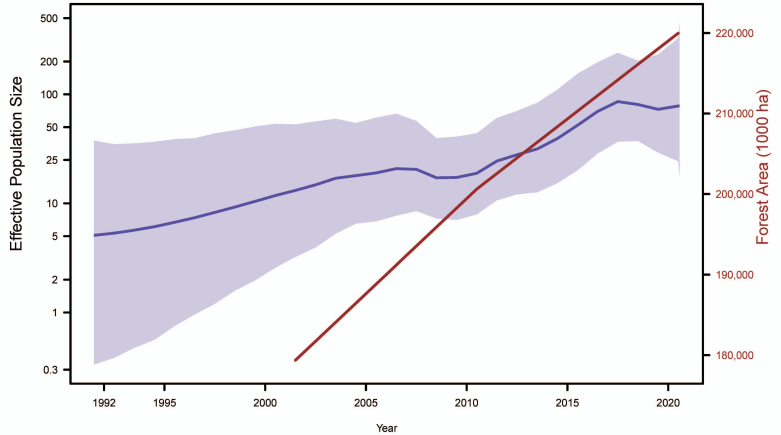

### C

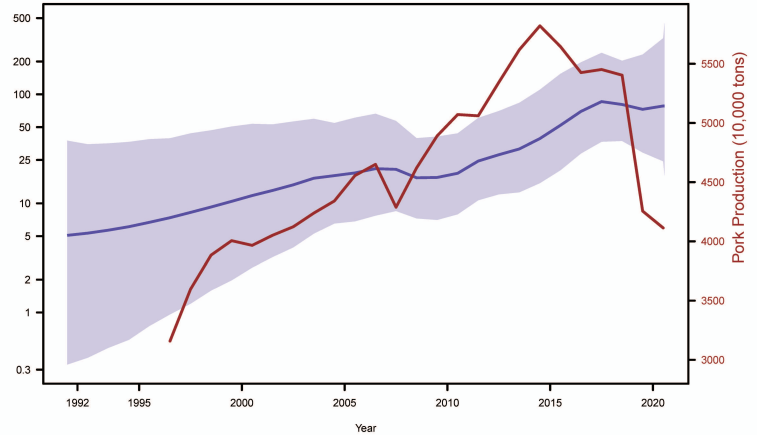

### B

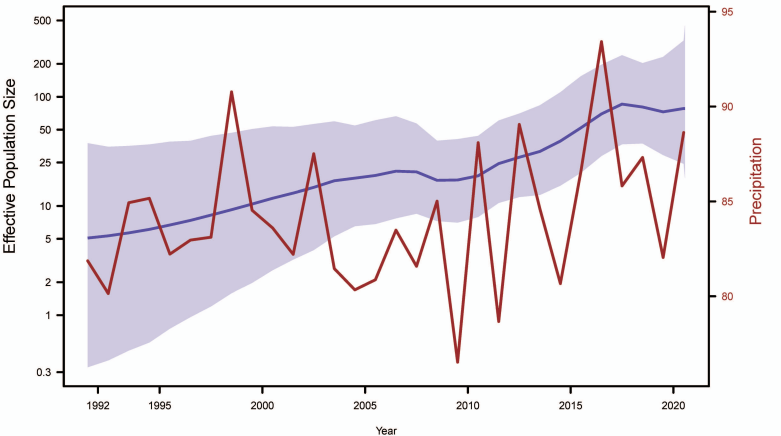

### D

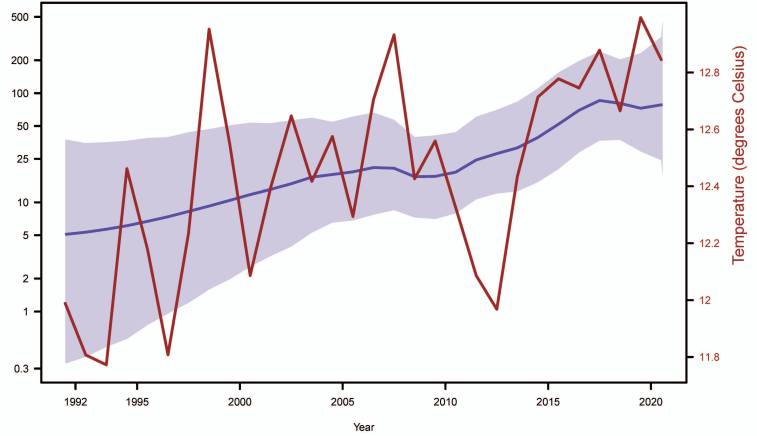

Figure S6

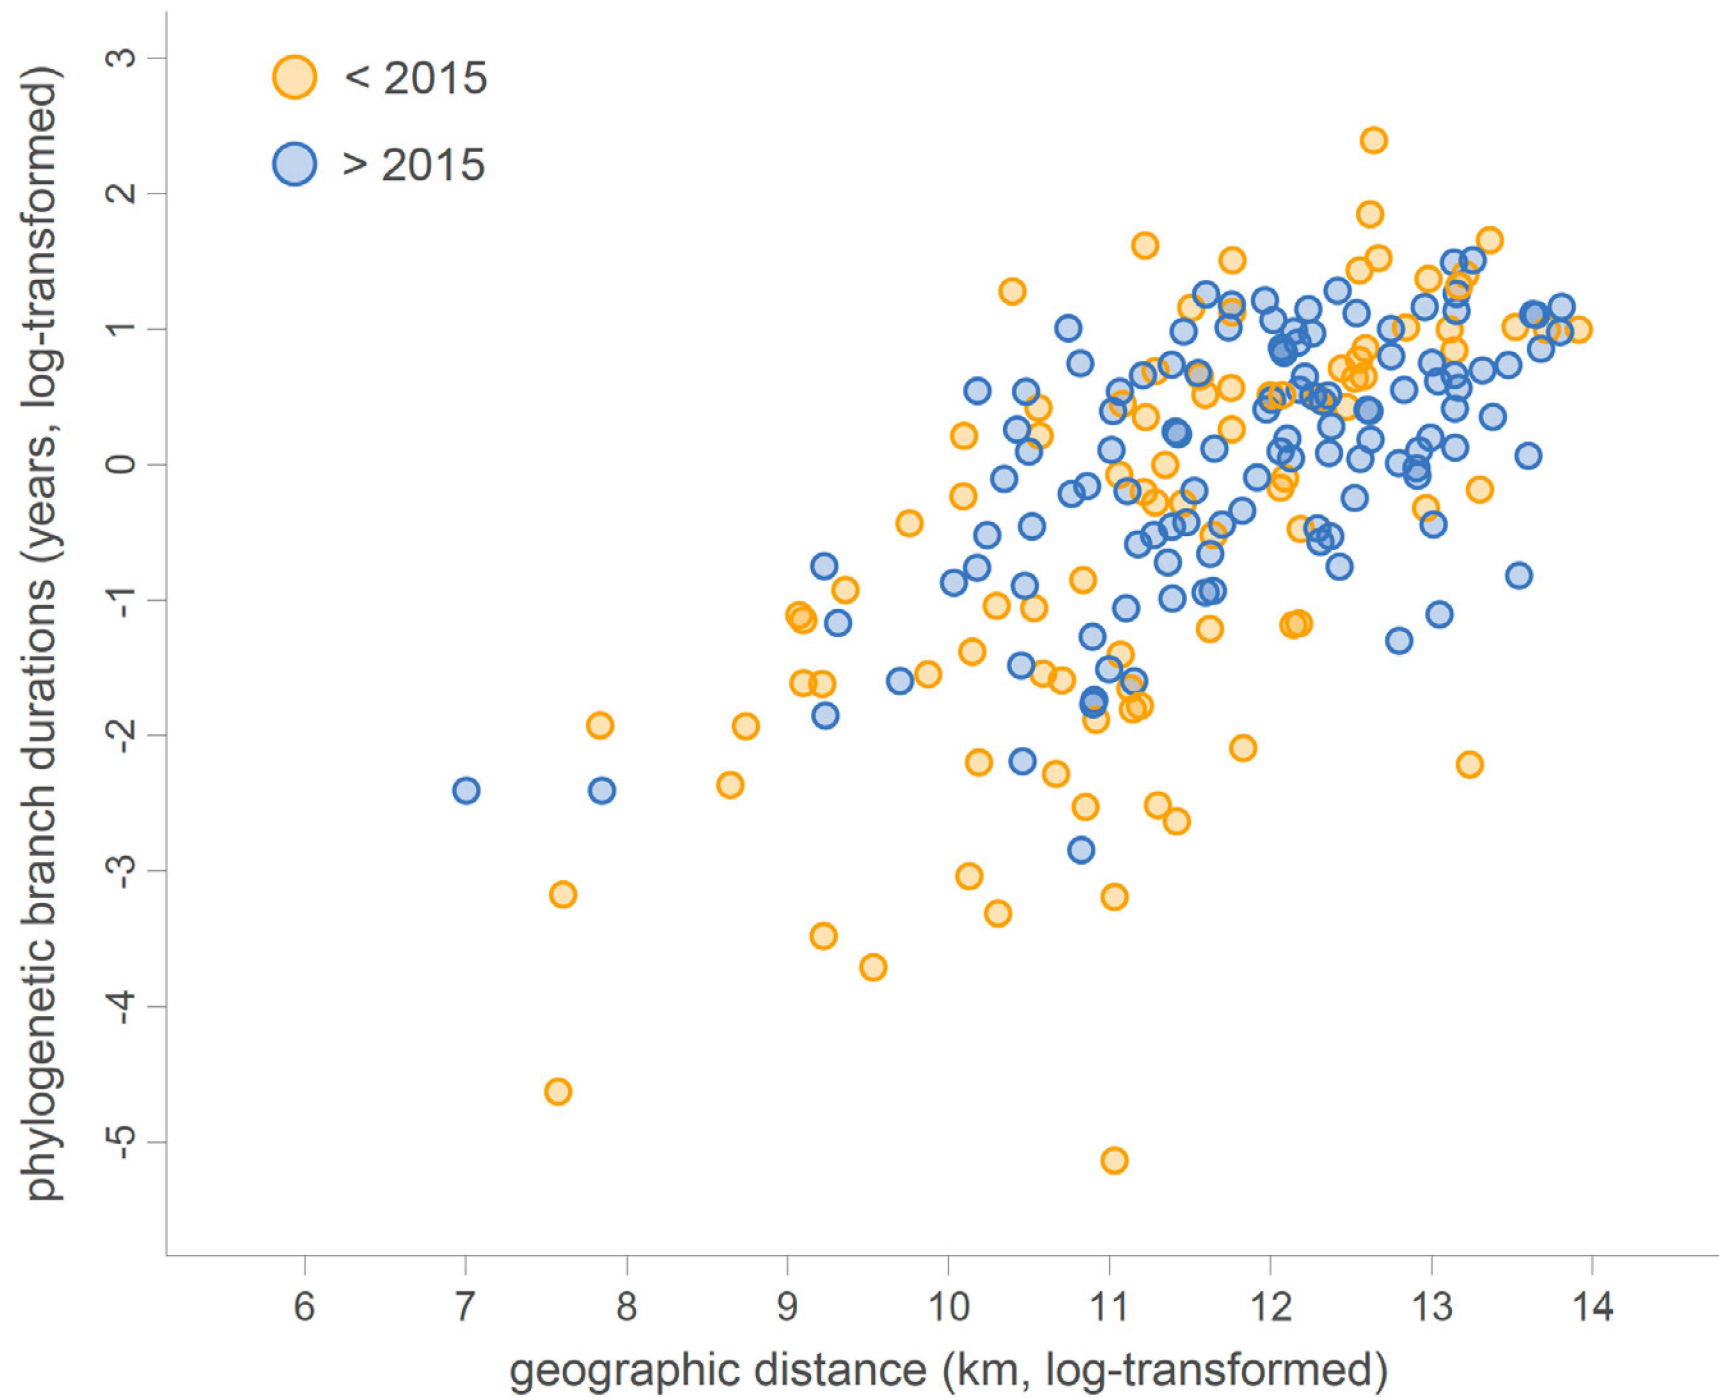

Supplement: jvi.01091-22-s0001.pdf [file jvi.01091-22-s0001.pdf]
